# Supplementary material
Source: HighWire-hosted journal article supplement (https://jnm.snmjournals.org/highwire/filestream/94960/field_highwire_adjunct_files/0/170308_Supplemental_Data.pdf)
Supplement: 170308_Supplemental_Data.pdf [file 170308_Supplemental_Data.pdf]

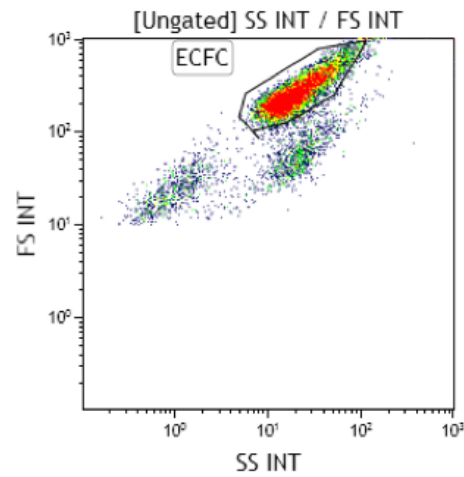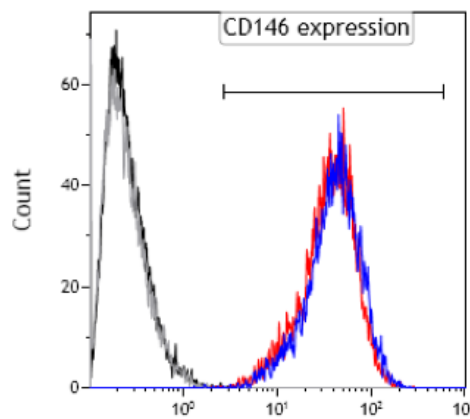

| Marker           | %Gated | X-Med |
|------------------|--------|-------|
| All              | 100,00 | 42,25 |
| All              | 100,00 | 0,22  |
| All              | 100,00 | 37,66 |
| All              | 100,00 | 0,23  |
| CD146 expression | 99,92  | 42,28 |
| CD146 expression | 0,00   | N/A   |
| CD146 expression | 99,91  | 37,68 |
| CD146 expression | 0,01   | 2,98  |

**Assessment of CD146 expression by flow cytometry analysis.** Representative sample of histogram gating (top frame) and cell population distribution and median of count quantifications (bottom frame, X-Med column) following flow cytometry assessing CD146 expression. Blue: ECFC<sub>PBS</sub> incubated with anti-CD146 antibody; red: ECFC<sub>EPO</sub> incubated with anti-CD146 antibody; grey: ECFC<sub>PBS</sub> incubated with IgG antibody; black: ECFC<sub>EPO</sub> incubated with IgG antibody.
